# Supplementary material for: Fossil Corals With Various Degrees of Preservation Can Retain Information About Biomineralization-Related Organic Material
Source: Frontiers journal article supplement (doi:10.3389/feart.2021.643864), 2021-06-23
Supplement: Data_Sheet_1.PDF [file Data_Sheet_1.PDF]

**Supplementary Information: Fossil corals with various degrees of preservation can retain information about biomineralization-related organic material**

**Jeana L. Drake<sup>1,2,3\*+</sup>, Maxence Guillermic<sup>2,4,5+</sup>, Robert A. Eagle<sup>2,4,5</sup>, David K. Jacobs<sup>2,3\*</sup>**

<sup>1</sup>Department of Marine Biology, University of Haifa, Israel

<sup>2</sup>Department of Earth, Planetary, and Space Sciences, University of California – Los Angeles, 595 Charles Young Drive E., Los Angeles, CA 90095, USA

<sup>3</sup>Department of Ecology and Evolutionary Biology, University of California – Los Angeles, 612 Charles Young Drive E., Los Angeles, CA 90095, USA

<sup>4</sup>Department of Atmospheric and Oceanic Sciences, Institute of the Environment and Sustainability, 520 Portola Plaza, University of California – Los Angeles, CA 90095, USA

<sup>5</sup>Université de Brest Occidentale, Institut Universitaire Européen de la Mer, LGO, Rue Dumont d'Urville, 29280, Plouzané, France

<sup>+</sup>These authors have contributed equally to this work and share first authorship.

## 1 Elemental measurement reproducibility and uncertainty

The typical blanks for a 30 ppm Ca session were:  $^7\text{Li} < 2\%$ ,  $^{11}\text{B} < 7\%$ ,  $^{25}\text{Mg} < 0.2\%$  and  $^{43}\text{Ca} < 0.02\%$ . Analytical uncertainty of a single measurement was calculated from the reproducibility of the Cam-Wuellestorf, measured during a particular mass spectrometry session. The analytical uncertainties on the X/Ca ratios are:  $\pm 7 \mu\text{mol/mol}$  for B/Ca,  $\pm 0.01 \text{ mmol/mol}$  for Sr/Ca,  $\pm 0.01 \text{ mmol/mol}$  for Mg/Ca,  $\pm 0.4 \mu\text{mol/mol}$  for Li/Ca,  $\pm 0.1 \mu\text{mol/mol}$  for Ba/Ca, and  $\pm 7 \mu\text{mol/mol}$  for Mn/Ca, respectively (Guillermic et al., 2020).

## 2 Range of elemental ratios from modern corals

We did not attempt to make an exhaustive compilation of modern element/Ca ratios. The ranges presented for B/Ca, Sr/Ca, Mg/Ca, Li/Ca, Ba/Ca and Mn/Ca grey bars in Fig. 1 and 3 are presented at 2 SD.

B/Ca modern range was calculated based on 336 values from 6 corals, B/Ca =  $483 \pm 200 \mu\text{mol/mol}$  (2 SD, n=336, (Comeau et al., 2017; McCulloch et al., 2017; Guillermic et al., accepted)).

Sr/Ca modern range was calculated based on 1722 values from 9 corals, Sr/Ca =  $9.1 \pm 0.4 \text{ mmol/mol}$  (2 SD, n=1722, (Felis et al., 2004; Kuhnert et al., 2005; Allison et al., 2011; Giry et al., 2012; D'Olivo et al., 2019; Guillermic et al., accepted)).

Mg/Ca modern range was calculated based on 699 values from 7 corals, Mg/Ca =  $4.8 \pm 1.1 \text{ mmol/mol}$  (2 SD, n=699, Felis et al., 2014a; (Allison et al., 2011; Hathorne et al., 2013b; D'Olivo et al., 2019; Guillermic et al., accepted)).

Li/Ca modern range was calculated based on 690 values from 5 corals, Li/Ca =  $6.6 \pm 1.2 \mu\text{mol/mol}$  (2SD, n=690, (Hathorne et al., 2013a; D'Olivo et al., 2019; Guillermic et al., accepted)).

Ba/Ca modern range was calculated based on 82 values from 2 corals, Ba/Ca =  $29 \pm 23 \mu\text{mol/mol}$  (2SD, n=82, (Guillermic et al., accepted)).

Mn/Ca modern range was selected between 0.01–10  $\mu\text{mol/mol}$  (Shen et al., 1991).

### 3 Supplementary Figures

**Supplementary Figure 1.** X-ray powder diffractogram for ground and cleaned powders of select fossil specimens examined here. As milling can lead to recrystallization of aragonite to calcite (Gill et al., 1995; Waite and Swart), we chose to examine bulk ground powders of three specimens displaying mixed mineralogies of milled powders whose values are averaged between sub-samples taken within versus between corallites. This further analysis revealed that *P. maigensis* was 90/10 (previously 96.5/3.5), *M. annularis* 6 was 75/25 (previously 85/15), and *O. cavernosa* was 93/7 (previously 86.5/13.5) aragonite/calcite. This reveals no significant effect between the grinding/milling sample preparation in this study.

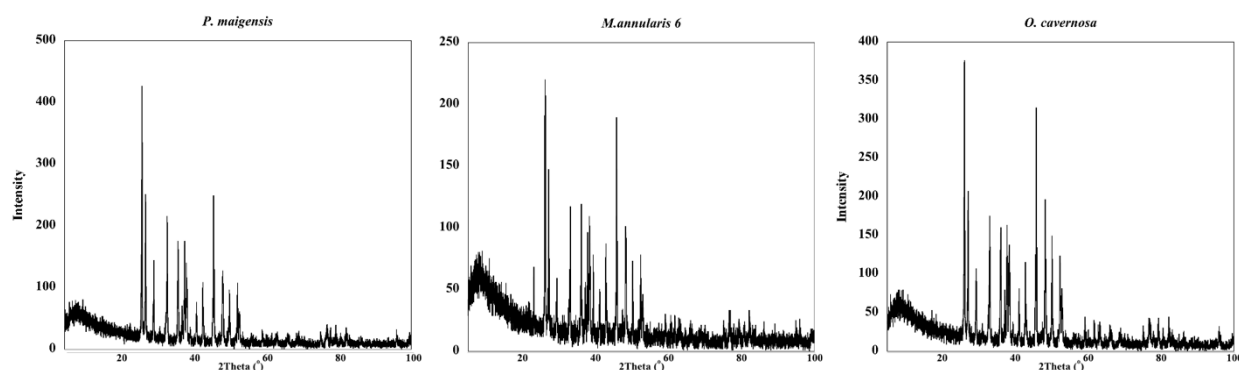

**Supplementary Figure 2.** X-ray power diffractogram for milled and cleaned powders of modern and fossil specimens examined here, arranged from 100% aragonite to 100% calcite/silicified. Species names used here are those provided by the loaning museum. Instrument and software settings were to analyze each sample from 5 to 100° 2θ for 10 s/step on 0.0167° steps at 45 kV and 40 mA, with irradiance length set to 10 mm of continuous width, a 1° fixed antiscatter slit applied to the incident beam, and 0.04 rad sollar slits applied to incident and diffracted beams. The modern *O. annularis* and fossils *O. annularis* 3 and 4 as well as *M. cavernosa* 1 have previously been reported in (Drake et al., 2020) and are reproduced with modifications here with permission of the journal of their original publication.

*Pocillopora damicornis* (modern)

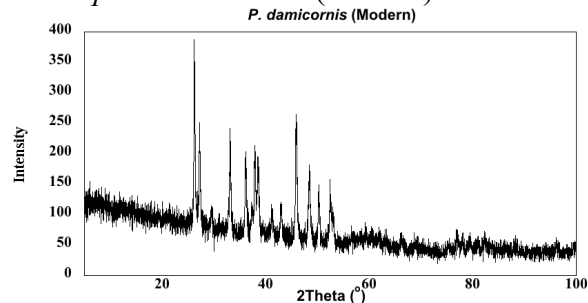

*Orbicella annularis* (modern)

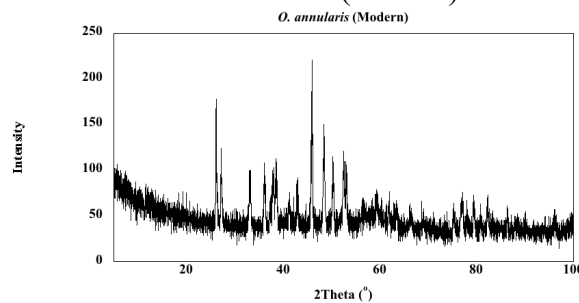

*Porites californica*

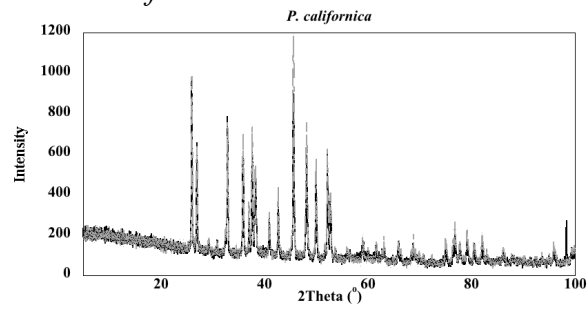

*Montastraea annularis 3*

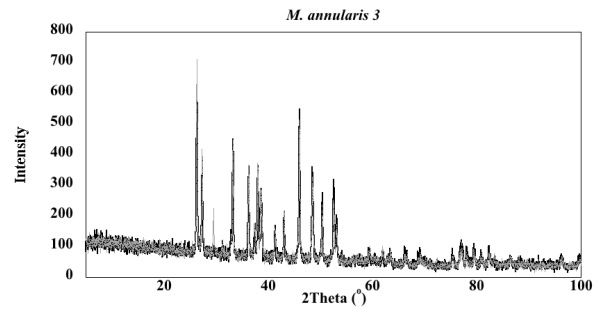

*Orbicella limbata*

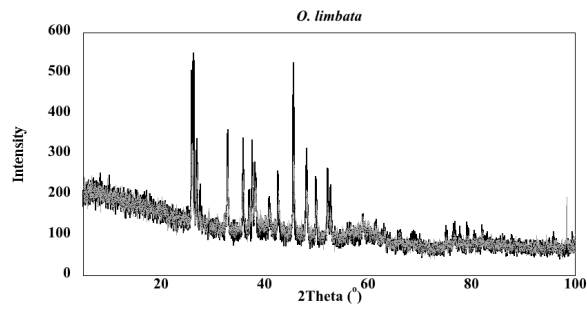

*Porites clavaria*

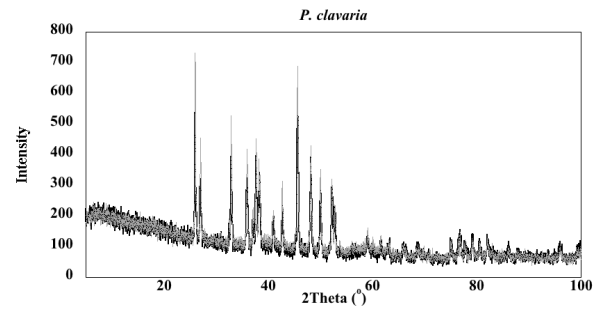

*Stylophora affinis*

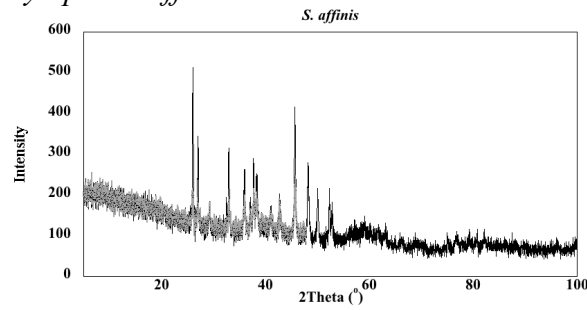

*Porites maigensis*

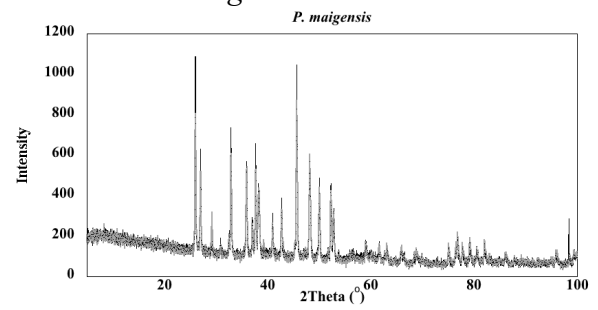

*Montastraea annularis 4*

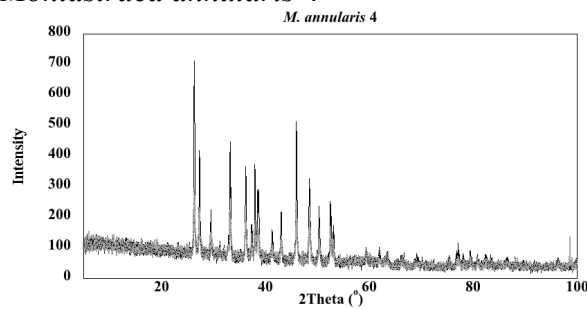

*Orbicella cavernosa*

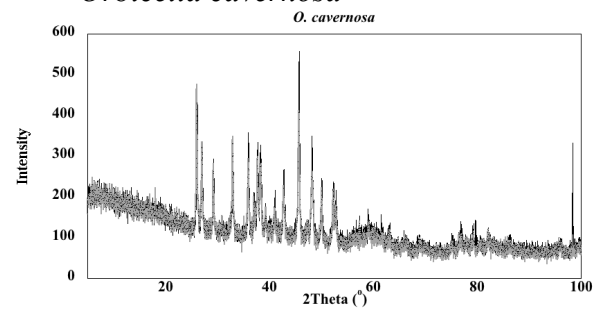

*Porites* sp.

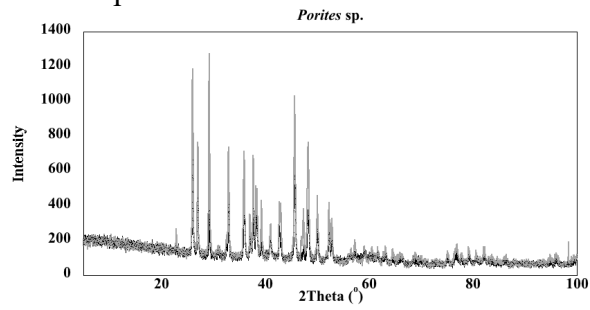

*Montastraea annularis* 6

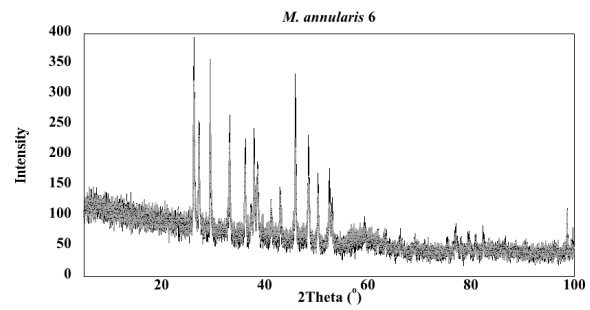

*Montastraea cavernosa* 1

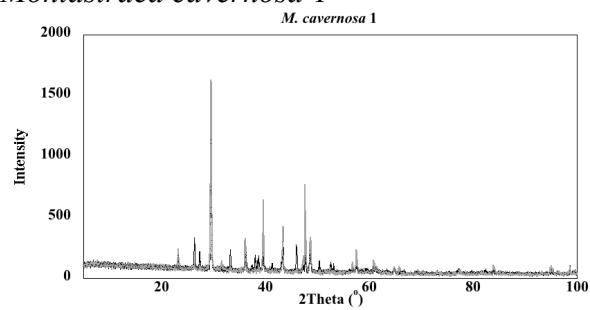

*Favia distans*

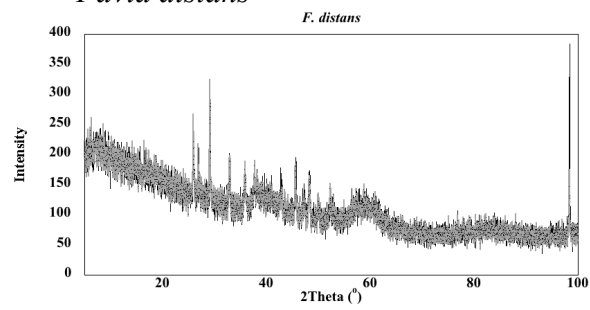

*Stylophora conferta*

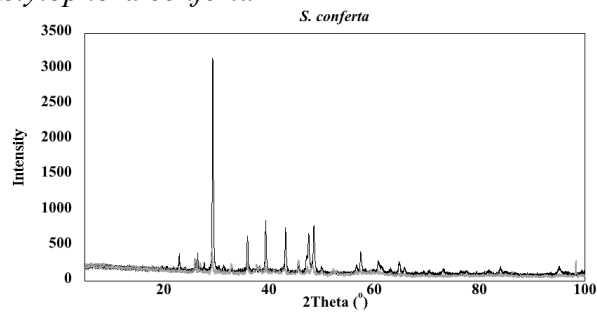

*Montastraea annularis* 2

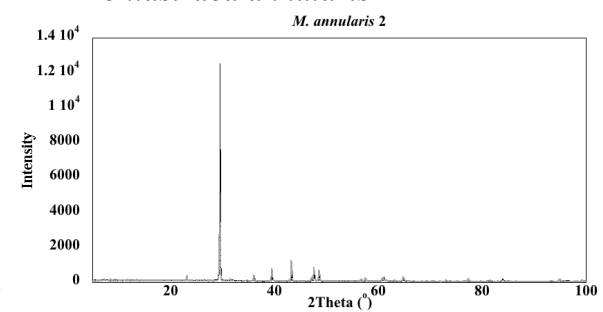

*Favia* sp. 1

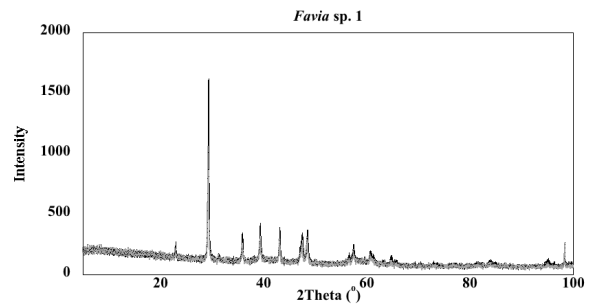

*Favia* sp. 2

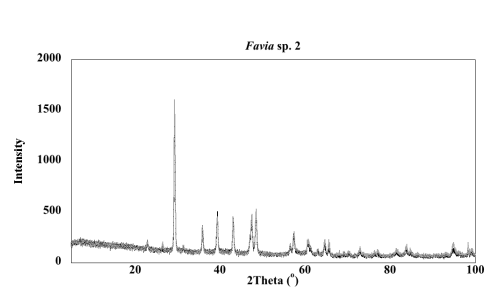

*Zaphrentis dalli*

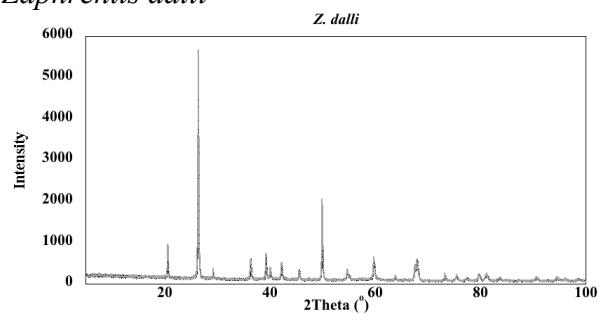

**Supplementary Figure 3.** Scanning electron micrographs of three Pleistocene corals displaying a range of mineralogies. *M. annularis* 4 is >90% aragonite (a,d,g), *M. annularis* 6 is 85/15 aragonite/calcite (b,e,h), and *M. annularis* 2 is >90% calcite (c,f,i). A change of texture is observed from the >90% aragonite sample (a, d, g) to the >90% calcite sample (c, f, i) which exhibits a blocky texture.

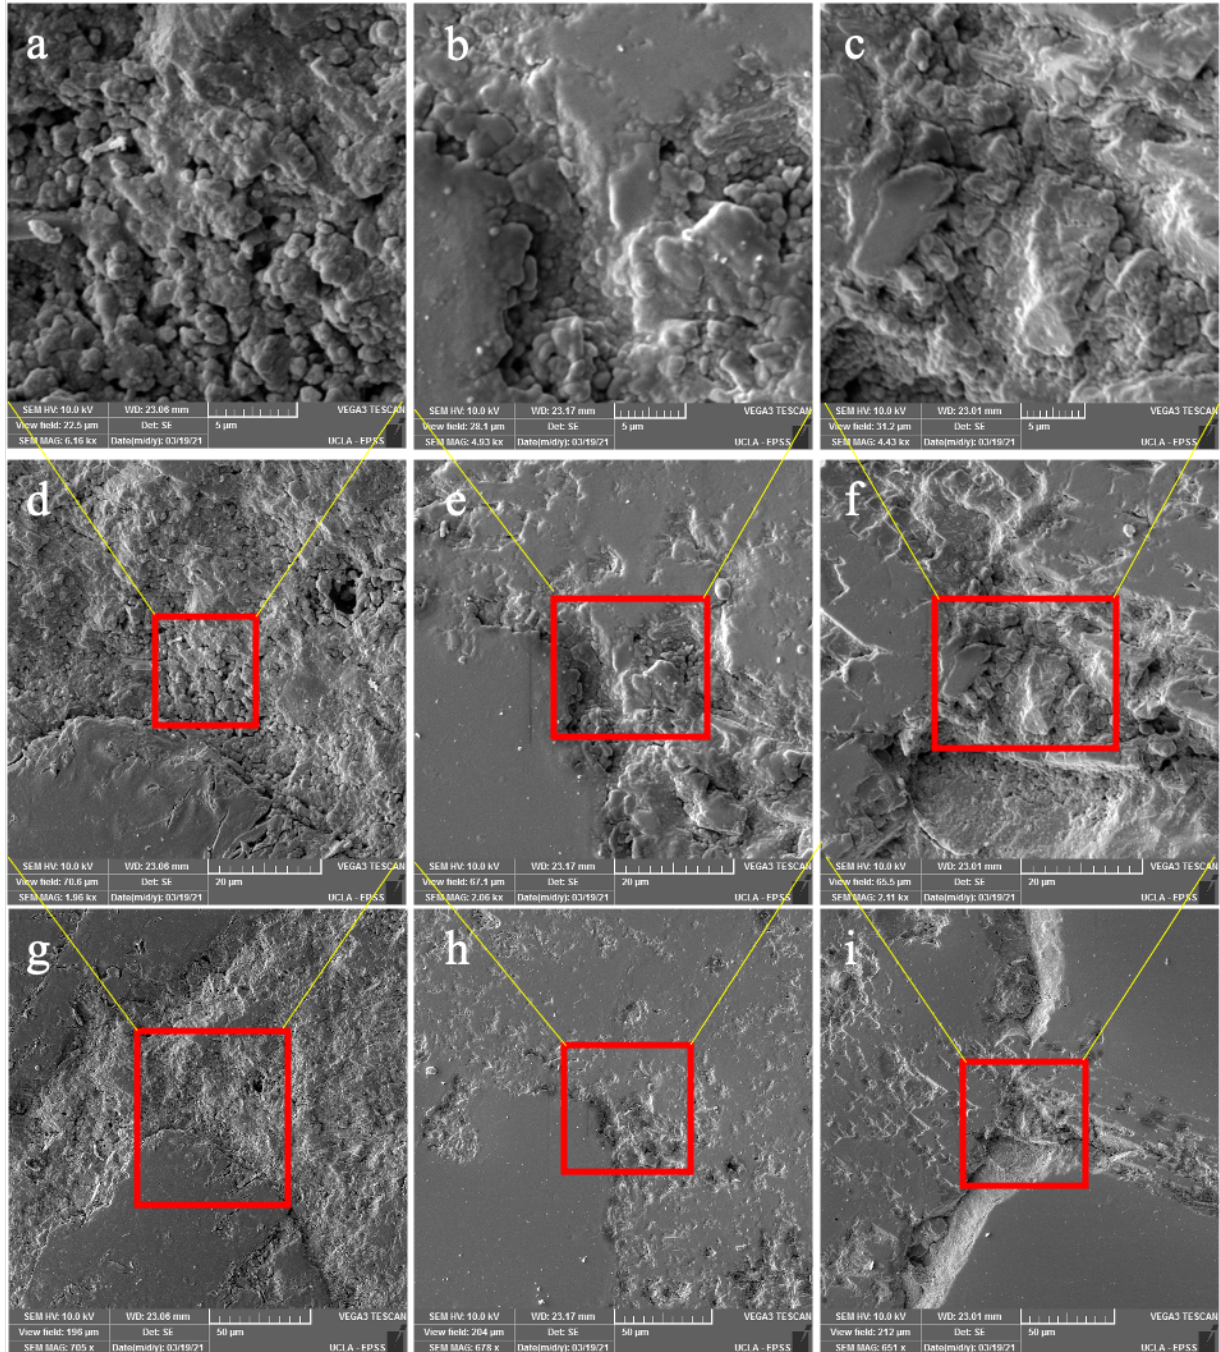

#### 4 Supplementary Table Legends

**Supplementary Table 1.** Trace elements of fossil coral skeletons displaying a range of mineralogies.

**Supplementary Table 2.** Racemization and composition of amino acids extracted as free and/or peptide-bound from modern and fossil coral skeletons.

**Supplementary Table 3.** Results of Wilcoxon tests comparing amino acid composition of grouped modern and fossil coral skeletons.

#### 5 References

- Allison, N., Cohen, I., Finch, A.A., and Erez, J. (2011). Controls on Sr/Ca and Mg/Ca in scleractinian corals: The effects of Ca-ATPase and transcellular Ca channels on skeletal chemistry. *Geochimica et Cosmochimica Acta* 75, 6350-6360.
- Comeau, S., Cornwall, C., and McCulloch, M. (2017). Decoupling between the response of coral calcifying fluid pH and calcification to ocean acidification. *Scientific Reports* 7, 1-10.
- D'Olive, J.P., Georgiou, L., Falter, J., DeCarlo, T.M., Irigoien, X., Voolstra, C.R., Roder, C., Trotter, J., and McCulloch, M.T. (2019). Long-term impacts of the 1997–1998 bleaching event on the growth and resilience of massive Porites corals from the central Red Sea. *Geochemistry, Geophysics, Geosystems* 20, 2936-2954.
- Drake, J.L., Whitelegge, J.P., and Jacobs, D.K. (2020). First sequencing of ancient coral skeletal proteins. *Scientific Reports* 10, 1-11.
- Felis, T., Lohmann, G., Kuhnert, H., Lorenz, S.J., Scholz, D., Pätzold, J., Al-Rousan, S.A., and Al-Moghrabi, S.M. (2004). Increased seasonality in Middle East temperatures during the last interglacial period. *Nature* 429, 164-168.
- Gill, I., Olson, J.J., and Hubbard, D.K. (1995). Corals, paleotemperature records, and the aragonite-calcite transformation. *Geology* 23, 333-336.
- Giry, C., Felis, T., Kölling, M., Scholz, D., Wei, W., Lohmann, G., and Scheffers, S. (2012). Mid-to late Holocene changes in tropical Atlantic temperature seasonality and interannual to multidecadal variability documented in southern Caribbean corals. *Earth and Planetary Science Letters* 331, 187-200.
- Guillermic, M., L., C.P., De Corte, I., Misra, S., Bijma, J., de Beer, D., Reymond, C., Westphal, H., Ries, J., and Eagle, R. (accepted). Thermal stress reduces Pocilloporid coral resilience to ocean acidification by impairing control over calcifying fluid chemistry. *Science Advances*.
- Guillermic, M., Misra, S., Eagle, R., Villa, A., Chang, F., and Tripathi, A. (2020). Seawater pH reconstruction using boron isotopes in multiple planktonic foraminifera species with different depth habitats and their potential to constrain pH and pCO<sub>2</sub> gradients. *Biogeosciences* 17, 3487-3510.
- Hathorne, E.C., Felis, T., Suzuki, A., Kawahata, H., and Cabioch, G. (2013a). Lithium in the aragonite skeletons of massive Porites corals: A new tool to reconstruct tropical sea surface temperatures. *Paleoceanography* 28, 143-152.
- Hathorne, E.C., Gagnon, A., Felis, T., Adkins, J., Asami, R., Boer, W., Caillon, N., Case, D., Cobb, K.M., and Douville, E. (2013b). Interlaboratory study for coral Sr/Ca and other element/Ca ratio measurements. *Geochemistry, Geophysics, Geosystems* 14, 3730-3750.



- Kuhnert, H., Crüger, T., and Pätzold, J. (2005). NAO signature in a Bermuda coral Sr/Ca record. *Geochemistry, Geophysics, Geosystems* 6.
- McCulloch, M.T., D'Olivo, J.P., Falter, J., Holcomb, M., and Trotter, J.A. (2017). Coral calcification in a changing world and the interactive dynamics of pH and DIC upregulation. *Nature communications* 8, 15686.
- Shen, G.T., Campbell, T.M., Dunbar, R.B., Wellington, G.M., Colgan, M.W., and Glynn, P.W. (1991). Paleochemistry of manganese in corals from the Galapagos Islands. *Coral Reefs* 10, 91-100.
- Waite, A.J., and Swart, P.K. (2015). The inversion of aragonite to calcite during the sampling of skeletal archives: implications for proxy interpretation. *Rapid Communications in Mass Spectrometry* 29, 955-964.
