# Supplementary material for: Fossil Corals With Various Degrees of Preservation Can Retain Information About Biomineralization-Related Organic Material
Source: Frontiers journal article supplement (doi:10.3389/feart.2021.643864), 2021-06-23
Supplement: Table_1.XLSX [file Table_1.XLSX]

## Sheet: Sheet1
Species	Average Fraction THAA that is FAA	Average pmol AA/mg skeleton	Average Percent Asx-THAA	Average Percent Glx_THAA	Average Percent Asx+Glx-THAA	Average D/L Asx-THAA	Average D/L Glx-THAA	Average L-Ser/L-Asx THAA	Average Percent Asx-FAA	Average Percent Glx-FAA	Average Percent Asx+Glx-FAA	Average D/L Asx-FAA	Average D/L Glx-FAA	Average L-Ser/L-Asx FAA
Favia distans	51.3324	329.383	25.727	20.88	46.607	0.498	0.686	0.128	23.9426	9.36659	33.3092	0.906081	0.979452	0.0377569
Favia sp. 1	39.215	15.0003	12.377	17.842	30.219	0.161	0.154	1.322	11.048	8.55895	19.607	0.479532	0.765766	1.49708
Favia sp. 2	28.267	18.0663	9.362	13.121	22.483	0.136	0.323	2.257	8.04813	7.7636	15.8117	0.384615	0.578512	2.13986
Orbicella annularis 2	68.8423	110.381	45.016	13.104	58.12	0.611	0.47	0.188	48.113	6.364	54.477	0.769	0.558	0.219
Orbicella annularis 3	86.2849	507.404	42.387	18.029	60.416	0.723	0.687	0.058	47.952	8.15	56.102	0.912	0.819	0.06
Orbicella annularis 4	42.9098	889.674	36.9273	18.1851	55.1124	0.38	0.279	0.134	44.076	7.74066	51.8166	0.879	0.78	0.105
Orbicella annularis 6	71.5397	887.198	45.614	18.402	64.016	0.725	0.65	0.033	48.198	9.02	57.218	0.897	0.748	0.033
Montastraea cavernosa 1	45.9768	221.025	37.601	16.434	54.035	0.634	0.547	0.107	41.404	8.096	49.5	0.838	0.673	0.198
Orbicella cavernosa	63.6051	179.024	10.184	26.871	37.055	0.571	0.878	0.229	7.8918	12.0072	19.899	0.811945	0.995112	0.0927835
Orbicella limbata	106.721	121.094	7.147	25.844	32.991	0.468	0.917	0.444	4.7209	14.9221	19.643	0.849693	1.01373	0.125767
Porites californica	100.3	759.731	55.015	13.278	68.293	0.804	0.69	0.016	58.5691	4.80285	63.3719	0.925581	0.748715	0.00534154
Porites clavaria	51.3968	1016.56	67.36	10.845	78.205	0.394	0.205	0.049	59.871	5.30891	65.18	0.693618	0.392923	0.074571
Porites maigensis	85.655	323.757	3.763	25.682	29.445	0.636	0.972	0.576	2.97272	10.7441	13.7168	0.79399	1.0282	0.619338
Porites sp.	61.4086	388.439	3.633	65.086	68.719	0.59	1.009	0.387	5.02329	37.6502	42.6735	0.776253	1.02578	0.0927804
Stylophora affinis	86.8147	67.5336	8.417	28.938	37.355	0.484	0.856	0.385	6.37007	12.6727	19.0428	0.841657	0.993373	0.168088
Stylophora conferta	268.963	92.005	9.628	24.65	34.278	0.779	0.953	0.207	11.0258	11.0044	22.0302	0.890526	0.964384	0.0978947
Zaphrentis dalli	31.8874	39.9465	10.389	18.255	28.644	0.136	0.062	1.587	30.4055	10.8645	41.27	0.298541	0.222089	0.746582
Pocillopora damicornis 1 modern	13.851	252.153	38.5911	18.9852	57.5763	0.143384	0.0726353	0.192511	29.5174	17.6133	47.1307	0.198379	0.0906276	0.214982
Orbicella annularis modern	2.84307	2024.88	56.5856	17.9235	74.5091	0.192652	0.0843717	0.074041	34.05	8.04077	42.0908	0.335766	0.271712	0.360303
