# Supplementary material for: Fossil Corals With Various Degrees of Preservation Can Retain Information About Biomineralization-Related Organic Material
Source: Frontiers journal article supplement (doi:10.3389/feart.2021.643864), 2021-06-23
Supplement: Table_2.XLSX [file Table_2.XLSX]

## Sheet: PercentAsxTHAA
Kruskal-Wallis Rank Sum Test in R Studio
Kruskal-Wallis chi-squared = 29.213, df = 5, p-value = 2.106e-05
Pairwise comparisons using Wilcoxon Rank Sum Test in R Studio
	Good candidate aragonite	Good candidate other mineralogy	Poor candidate aragonite	Poor candidate other mineralogy	Silicified
Modern	1	1	0.2286	0.0143	1
Good candidate aragonite		0.2598	0.1048	0.0015	0.5
Good candidate other mineralogy			0.024	4.6e-05	1
Poor candidate aragonite				1	0.8
Poor candidate other mineralogy					0.1978

## Sheet: L-Ser_L-AsxTHAA
Kruskal-Wallis Rank Sum Test in R Studio
Kruskal-Wallis chi-squared = 28.875, df = 5, p-value = 2.453e-05
Pairwise comparisons using Wilcoxon Rank Sum Test in R Studio
	Good candidate aragonite	Good candidate other mineralogy	Poor candidate aragonite	Poor candidate other mineralogy	Silicified
Modern	0.10476	1	0.22857	0.09231	0.66667
Good candidate aragonite		0.203	0.10476	0.00151	0.42867
Good candidate other mineralogy			0.02597	0.00056	0.22857
Poor candidate aragonite				1	0.66667
Poor candidate other mineralogy					0.6667

## Sheet: pmolAA_mgskeleton
Kruskal-Wallis Rank Sum Test in R Studio
Kruskal-Wallis chi-squared = 9.7384, df = 5, p-value = 0.083
Wilcoxon Rank Sum Test p-value in R Studio
	Good candidate aragonite	Good candidate other mineralogy	Poor candidate aragonite	Poor candidate other mineralogy	Silicified
Modern	0.4	0.381	0.333	0.07143	0.6667
Good candidate aragonite		0.5714	0.5536	0.6041	1
Good candidate other mineralogy			0.09524	0.05195	0.3333
Poor candidate aragonite				0.1798	0.6667
Poor candidate other mineralogy					1
Silicified
